# Supplementary material
Source: publisher figshare collection journal article supplement (https://frontiersin.figshare.com/ndownloader/files/34201572)
Supplement: Supplementary file [file 34201572]

# SUPPLEMENTARY MATERIAL

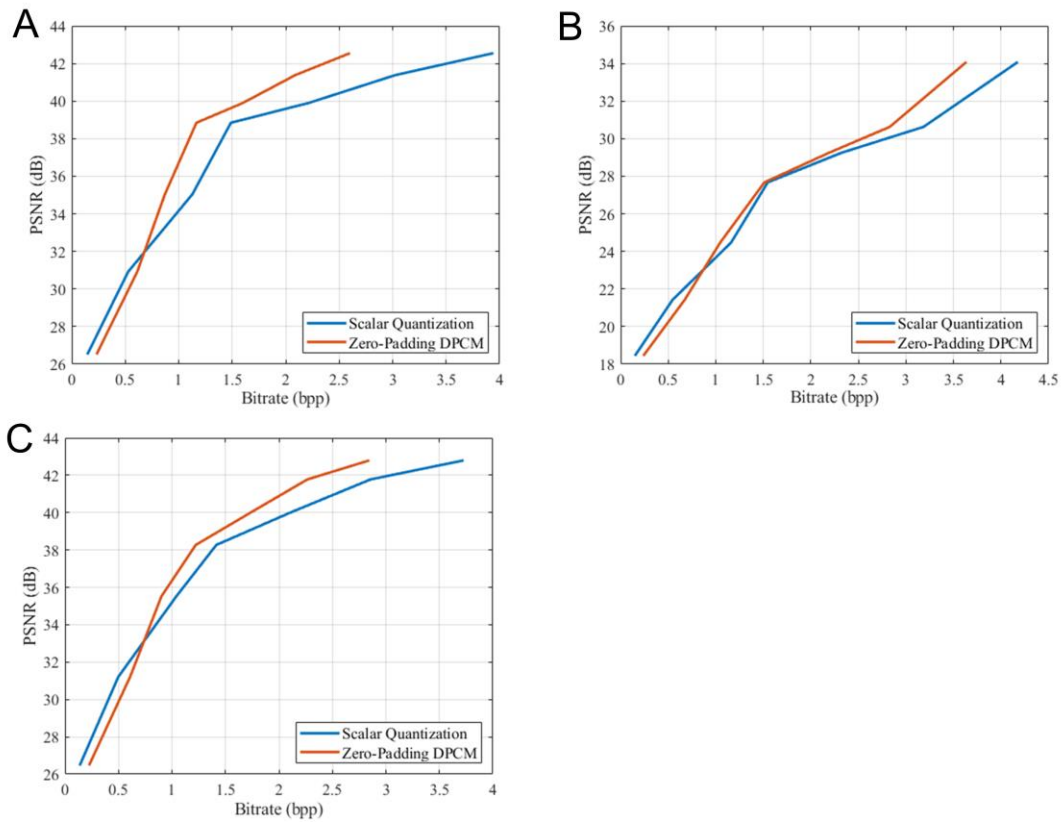

**Figure S1.** Rate-distortion curves of the reconstructed (A) *Foreman*, (B) *Mobile* and (C) *Football* sequences when the zero-padding DPCM and SQ are respectively used to quantize the adaptive CS measurements.
